# Supplementary material for: Overwintering honeybees maintained dynamic and stable intestinal bacteria
Source: PubMed Central journal article supplement (PMC8593070; doi:10.1038/s41598-021-01204-7), 2021-11-15
Supplement: 41598_2021_1204_MOESM1_ESM.pdf [file 41598_2021_1204_MOESM1_ESM.pdf]

# **Overwintering honeybees maintained dynamic and stable intestinal bacteria**

Peng Liu<sup>#</sup>, Yujie Zhu<sup>#</sup>, Liang Ye<sup>#</sup>, Tengfei Shi, Lai Li, Haiqun Cao, Linsheng Yu\*

<sup>#</sup>These authors contributed equally to this work.

## **Author information**

### **Affiliations**

College of Plant Protection, Anhui Agricultural University, Hefei, Anhui Province, China

Peng Liu, Liang Ye, Tengfei Shi, Haiqun Cao & Linsheng Yu

College of Animal Science and Technology, Anhui Agricultural University, Hefei, Anhui Province, China

Yujie Zhu & Lai Li

### **contact information**

Peng Liu, e-mail: [1042329682@qq.com](mailto:1042329682@qq.com)

Yujie Zhu, e-mail: [343020289@qq.com](mailto:343020289@qq.com)

Liang Ye, e-mail: [623545372@qq.com](mailto:623545372@qq.com)

Tengfei Shi, e-mail: [stf0623@163.com](mailto:stf0623@163.com)

Lai Li, e-mail: [920809351@qq.com](mailto:920809351@qq.com)

Haiqun Cao, e-mail: [haiquncao@163.com](mailto:haiquncao@163.com)

Linsheng Yu, e-mail: [yulinshengahau@163.com](mailto:yulinshengahau@163.com)

**Supplementary Tab. 1** Sequences filtering statistics.

| Sample | input | filtered | percentage of input passed filter | denoised | percentage of input denoised | non-chimeric | percentage of input non-chimeric |
|--------|-------|----------|-----------------------------------|----------|------------------------------|--------------|----------------------------------|
| BO1    | 80283 | 72189    | 89.9%                             | 71273    | 88.78%                       | 71273        | 88.78%                           |
| BO2    | 73448 | 65137    | 88.7%                             | 64356    | 87.62%                       | 64356        | 87.62%                           |
| BO3    | 77951 | 67755    | 86.9%                             | 66976    | 85.92%                       | 66976        | 85.92%                           |
| PO1    | 80935 | 65194    | 80.1%                             | 64526    | 79.73%                       | 64526        | 79.73%                           |
| PO2    | 81113 | 64876    | 80.0%                             | 63974    | 78.87%                       | 63974        | 78.87%                           |
| PO3    | 73197 | 65623    | 89.7%                             | 64731    | 88.43%                       | 64731        | 88.43%                           |
| MO1    | 75507 | 68104    | 90.2%                             | 67196    | 88.99%                       | 67196        | 88.99%                           |
| MO2    | 79810 | 70935    | 88.9%                             | 70146    | 87.89%                       | 70146        | 87.89%                           |
| MO3    | 63767 | 57882    | 90.8%                             | 56890    | 89.22%                       | 56890        | 89.22%                           |
| LO1    | 79225 | 63682    | 80.4%                             | 62947    | 79.45%                       | 62947        | 79.45%                           |
| LO2    | 71039 | 62006    | 87.3%                             | 61276    | 86.26%                       | 61276        | 86.26%                           |
| LO3    | 72994 | 58384    | 80.0%                             | 57774    | 79.15%                       | 57774        | 79.15%                           |
| EO1    | 81110 | 65577    | 80.8%                             | 64779    | 79.87%                       | 64779        | 79.87%                           |
| EO2    | 79645 | 68894    | 86.5%                             | 68039    | 85.43%                       | 68039        | 85.43%                           |
| EO3    | 74631 | 63278    | 84.8%                             | 62378    | 83.58%                       | 62378        | 83.58%                           |
| AO1    | 75924 | 63128    | 83.1%                             | 62344    | 82.11%                       | 62344        | 82.11%                           |
| AO2    | 78156 | 61669    | 78.9%                             | 60991    | 78.04%                       | 60991        | 78.04%                           |
| AO3    | 75432 | 62867    | 83.3%                             | 62164    | 82.41%                       | 62164        | 82.41%                           |

Input – initial number of sequences. Filtered – number of reads after removing low-quality data. Denoised – number of reads after removing data considered as noise. Non-chimeric – number of sequences after chimera removal.
